# Supplementary material for: Nationwide COVID-19-EII Study: Incidence, Environmental Risk Factors and Long-Term Follow-Up of Patients with Inflammatory Bowel Disease and COVID-19 of the ENEIDA Registry
Source: MDPI journal article supplement (doi:10.3390/jcm11020421), 2022-01-14
Supplement: s1 [file s1]

Supplementary Table S1: Comorbidities

| <b>Comorbidities</b>                                |          |
|-----------------------------------------------------|----------|
| Arterial hypertension, <i>n</i> (%)                 | 106 (22) |
| Dyslipidaemia, <i>n</i> (%)                         | 74 (15)  |
| Immune-mediated diseases, <i>n</i> (%)              | 53 (11)  |
| Diabetes mellitus, <i>n</i> (%)                     | 35 (7.2) |
| Ischemic cardiomyopathy, <i>n</i> (%)               | 30 (6.2) |
| Chronic renal insufficiency, <i>n</i> (%)           | 20 (4.1) |
| Chronic Obstructive Pulmonary Disease, <i>n</i> (%) | 18 (3.7) |
| Neoplasia, <i>n</i> (%)                             | 17 (3.5) |
| Cirrhosis, <i>n</i> (%)                             | 6 (1.2)  |
| Cerebral stroke, <i>n</i> (%)                       | 5 (1)    |
| Dementia, <i>n</i> (%)                              | 4 (0.8)  |
| Comorbidities, <i>n</i> (%)                         |          |
| None                                                | 272 (56) |
| One                                                 | 111 (23) |
| Two                                                 | 52 (11)  |
| Three or more                                       | 49 (10)  |
| Charlson score, <i>n</i> (%)                        |          |
| Zero                                                | 174 (36) |
| Mild (one-two)                                      | 196 (40) |
| Moderate (three-four)                               | 66 (14)  |
| Severe (five or more)                               | 48 (9.9) |

Supplementary Table S2. Symptoms at COVID-19 diagnosis

| Symptoms at COVID-19 diagnosis   |                                                                   |
|----------------------------------|-------------------------------------------------------------------|
| Fever, <i>n</i> (%)              | 336 (69)                                                          |
| Cough, <i>n</i> (%)              | 305 (63)                                                          |
| Asthenia, <i>n</i> (%)           | 184 (38)                                                          |
| Myalgia/Arthralgia, <i>n</i> (%) | 148 (30)                                                          |
| Dyspnoea, <i>n</i> (%)           | 134 (28)                                                          |
| Diarrhoea, <i>n</i> (%)          | 126 (26)<br>IBD in remission 100 vs. Active IBD 26, <i>p</i> =0.1 |
| Anosmia, <i>n</i> (%)            | 117 (24)                                                          |
| Headache, <i>n</i> (%)           | 113 (23)                                                          |
| Dysgeusia, <i>n</i> (%)          | 81 (17)                                                           |
| Expectoration, <i>n</i> (%)      | 34 (7)                                                            |
| Abdominal pain, <i>n</i> (%)     | 32 (6.6)                                                          |
| Nasal congestion, <i>n</i> (%)   | 27 (5.6)                                                          |
| Odynophagia, <i>n</i> (%)        | 17 (3.5)                                                          |
| Low-grade fever, <i>n</i> (%)    | 12 (2.5)                                                          |
| Nausea/vomiting, <i>n</i> (%)    | 7 (1.4)                                                           |
| Cutaneous lesions, <i>n</i> (%)  | 8 (1.6)                                                           |
| Chest pain, <i>n</i> (%)         | 7 (1.4)                                                           |

Supplementary Table S3. Tests performed for COVID-19 diagnosis

|                                                         |           |
|---------------------------------------------------------|-----------|
| SARS-CoV-2 PCR, <i>n</i> (%)                            | 388 (80)  |
| Positive                                                | 301 (62)  |
| Negative                                                | 86 (18)   |
| Number of previous negative PCR before testing positive |           |
| One                                                     | 66 (14)   |
| Two                                                     | 13 (2.7)  |
| Three or more                                           | 6 (1.2)   |
| SARS-CoV-2 serology, <i>n</i> (%)                       | 167 (35)  |
| IgG +                                                   | 113 (23)  |
| IgM +                                                   | 32 (6.6)  |
| Point of care +                                         | 22 (4.6)  |
| No PCR nor SARS-CoV-2 serology, <i>n</i> (%)            | 49 (10.2) |
| PCR and/or SARS-CoV-2 serology negative, <i>n</i> (%)   | 39 (8.1)  |
| Chest-X-ray, <i>n</i> (%)                               | 292 (61)  |
| Abnormal                                                | 173 (36)  |
| Unilateral disease                                      | 46 (9.5)  |
| Bilateral disease                                       | 124 (26)  |
| Lung consolidation                                      | 78 (16)   |
| Interstitial disease                                    | 49 (10)   |
| Ground glass appearance                                 | 44 (9)    |

Supplementary Table S4. Clinical characteristics and treatment for IBD in patients who required **hospitalisation**

| Variable                                        | Hospitalised<br><i>n</i> = 168 | Non<br>hospitalised<br><i>n</i> = 314 | Univariate analysis | Multivariate analysis |                |                 |
|-------------------------------------------------|--------------------------------|---------------------------------------|---------------------|-----------------------|----------------|-----------------|
|                                                 |                                |                                       | <i>P</i> -value     | OR                    | CI             | <i>P</i> -value |
| Male gender, <i>n</i> (%)                       | 102 (61)                       | 149 (47)                              | 0.005               | 1.37                  | 0.88-2.1       | 0.16            |
| Ulcerative colitis, <i>n</i> (%)                | 86 (51)                        | 135 (43)                              | 0.09                | 0.8                   | 0.49-1.3       | 0.39            |
| E1                                              | 16 (9.5)                       | 27 (8.6)                              |                     |                       |                |                 |
| E2                                              | 36 (21)                        | 44 (14)                               |                     |                       |                |                 |
| E3                                              | 34 (20)                        | 64 (47)                               |                     |                       |                |                 |
| Crohn's disease location, <i>n</i> (%)          |                                |                                       | 0.17                |                       |                |                 |
| L1                                              | 42 (25)                        | 71 (23)                               |                     |                       |                |                 |
| L2                                              | 15 (8.9)                       | 28 (8.9)                              |                     |                       |                |                 |
| L3                                              | 21 (12)                        | 68 (22)                               |                     |                       |                |                 |
| L4 (isolated)                                   | 1 (0.6)                        | 2 (0.6)                               |                     |                       |                |                 |
| Crohn's disease behaviour, <i>n</i> (%)         |                                |                                       |                     |                       |                |                 |
| B1                                              | 46 (27)                        | 98 (31)                               | 0.88                |                       |                |                 |
| B2                                              | 19 (11)                        | 52 (17)                               | 0.30                |                       |                |                 |
| B3                                              | 18 (10.7)                      | 29 (9.2)                              | 0.27                |                       |                |                 |
| Perianal disease, <i>n</i> (%)                  | 19 (11)                        | 40 (13)                               | 0.87                |                       |                |                 |
| Extraintestinal manifestations,<br><i>n</i> (%) | 47 (28)                        | 78 (25)                               | 0.14                |                       |                |                 |
| Active smoker, <i>n</i> (%)                     | 18 (10.7)                      | 35 (11)                               | 0.99                |                       |                |                 |
| ≥ 40 years, <i>n</i> (%)                        | 149 (89)                       | 237 (75)                              | 0.001               |                       |                |                 |
| ≥ 50 years, <i>n</i> (%)                        | 128 (76)                       | 160 (51)                              | <b>&lt; 0.0001</b>  | <b>2.09</b>           | <b>1.3-3.4</b> | <b>0.004</b>    |
| ≥ 60 years, <i>n</i> (%)                        | 84 (50)                        | 65 (21)                               | < 0.0001            |                       |                |                 |
| Family history of IBD, <i>n</i> (%)             | 17 (10)                        | 47 (15)                               | 0.33                |                       |                |                 |
| ≥1 comorbidity, <i>n</i> (%)                    | 105 (62)                       | 106 (34)                              | <b>&lt; 0.0001</b>  | <b>2.28</b>           | <b>1.4-3.6</b> | <b>0.001</b>    |
| ≥2 comorbidity, <i>n</i> (%)                    | 60 (36)                        | 40 (13)                               | < 0.0001            |                       |                |                 |
| Charlson score ≥1, <i>n</i> (%)                 | 132 (78)                       | 177 (56)                              | < 0.0001            |                       |                |                 |
| Charlson score ≥2, <i>n</i> (%)                 | 102 (61)                       | 87 (28)                               | < 0.0001            |                       |                |                 |
| Occupational risk, <i>n</i> (%)                 | 30 (18)                        | 103 (33)                              | <b>0.001</b>        | 0.71                  | 0.4-1.2        | 0.19            |
| Good social distancing, <i>n</i> (%)            | 89 (53)                        | 146 (46)                              | 0.05                | 1.3                   | 0.8-2.05       | 0.26            |
| Active IBD, <i>n</i> (%)                        | 27 (16)                        | 56 (18)                               | 0.98                |                       |                |                 |

|                                                         |          |          |             |            |                |             |
|---------------------------------------------------------|----------|----------|-------------|------------|----------------|-------------|
| Steroids 3 months before COVID-19, <i>n</i> (%)         | 24 (14)  | 29 (9.2) | <b>0.09</b> | <b>1.3</b> | <b>1.1-1.6</b> | <b>0.03</b> |
| 5-aminosalicylates, at COVID-19 diagnosis, <i>n</i> (%) | 84 (50)  | 124 (39) | 0.03        | 0.96       | 0.5-1.8        | 0.89        |
| Steroids at COVID-19 diagnosis, <i>n</i> (%)            | 11 (6.5) | 15 (4.7) | 0.41        |            |                |             |
| Immunomodulators at COVID-19 diagnosis, <i>n</i> (%)    | 56 (33)  | 115 (37) | 0.47        |            |                |             |
| Tiopurines, <i>n</i> (%)                                | 45 (27)  | 102 (61) |             |            |                |             |
| Methotrexate, <i>n</i> (%)                              | 8 (4.8)  | 11 (3.5) |             |            |                |             |
| Biologics at COVID-19 diagnosis, <i>n</i> (%)           | 50 (30)  | 127 (40) | 0.06        | 0.96       | 0.5-1.8        | 0.89        |
| Anti-TNF at COVID-19 diagnosis, <i>n</i> (%)            | 28 (17)  | 89 (28)  | 0.004       | 0.6        | 0.3-1.3        | 0.19        |

IBD: inflammatory bowel disease, L1: ileal, L2: colonic, L3: ileocolic, L4: upper gastrointestinal tract. B1: inflammatory, B2: stricturing, B3: penetrant. E1: proctocolitis, E2: left-sided colitis, E3: pancolitis, TNF: tumour necrosis factor

Supplementary Table S5. Clinical characteristics and treatment for IBD in patients who required **ICU admission**

| Variable                                     | ICU admission<br><i>n</i> = 13 | Non-ICU admission<br><i>n</i> = 469 | Univariate analysis | Multivariate analysis |                 |                 |
|----------------------------------------------|--------------------------------|-------------------------------------|---------------------|-----------------------|-----------------|-----------------|
|                                              |                                |                                     | <i>P</i> -value     | OR                    | CI              | <i>P</i> -value |
| Male gender, <i>n</i> (%)                    | 9 (69)                         | 224 (48)                            | 0.18                |                       |                 |                 |
| Ulcerative colitis, <i>n</i> (%)             | 9 (69)                         | 201 (43)                            | 0.11                |                       |                 |                 |
| E1                                           | 1 (7.7)                        | 40 (8.5)                            |                     |                       |                 |                 |
| E2                                           | 3 (23)                         | 72 (15)                             |                     |                       |                 |                 |
| E3                                           | 5 (38)                         | 89 (19)                             |                     |                       |                 |                 |
| Crohn's disease location, <i>n</i> (%)       |                                |                                     | 0.89                |                       |                 |                 |
| L1                                           | 0                              | 41 (8.7)                            |                     |                       |                 |                 |
| L2                                           | 2 (15)                         | 82 (17)                             |                     |                       |                 |                 |
| L3                                           | 0                              | 3 (0.6)                             |                     |                       |                 |                 |
| L4 (isolated)                                |                                |                                     |                     |                       |                 |                 |
| Crohn's disease behaviour, <i>n</i> (%)      |                                |                                     | 0.13                |                       |                 |                 |
| B1                                           | 2 (15)                         | 63 (13)                             | 1                   |                       |                 |                 |
| B2                                           | 2 (15)                         | 43 (9.1)                            | 0.83                |                       |                 |                 |
| B3                                           |                                |                                     |                     |                       |                 |                 |
| Perianal disease, <i>n</i> (%)               | 2 (15)                         | 55 (12)                             | 0.54                |                       |                 |                 |
| Extraintestinal manifestations, <i>n</i> (%) | 3 (23)                         | 119 (25)                            | 0.84                |                       |                 |                 |
| Active smoker, <i>n</i> (%)                  | 0                              | 49 (10)                             | 0.26                |                       |                 |                 |
| ≥ 40 years, <i>n</i> (%)                     | 11 (85)                        | 357 (76)                            | 0.94                |                       |                 |                 |
| ≥ 50 years, <i>n</i> (%)                     | 11 (85)                        | 264 (56)                            | 0.07                |                       |                 |                 |
| ≥ 60 years, <i>n</i> (%)                     | 6 (46)                         | 133 (28)                            | 0.34                |                       |                 |                 |
| Family history of IBD, <i>n</i> (%)          | 3 (23)                         | 57 (12)                             | 0.53                |                       |                 |                 |
| ≥1 comorbidity, <i>n</i> (%)                 | 8 (61)                         | 191 (41)                            | 0.18                |                       |                 |                 |
| ≥2 comorbidity, <i>n</i> (%)                 | 5 (38)                         | 90 (19)                             | 0.21                |                       |                 |                 |
| Charlson score ≥1, <i>n</i> (%)              | 13 (100)                       | 308 (60)                            | 0.02                |                       |                 |                 |
| Charlson score ≥2, <i>n</i> (%)              | 10 (77)                        | 169 (36)                            | <b>0.005</b>        | <b>5.4</b>            | <b>1.5-20.1</b> | <b>0.011</b>    |

|                                                         |         |           |       |                                |           |      |
|---------------------------------------------------------|---------|-----------|-------|--------------------------------|-----------|------|
| Occupational risk, <i>n</i> (%)                         | 3 (23)  | 126 (27)  | 1     |                                |           |      |
| Good social distancing, <i>n</i> (%)                    | 9 (69)  | 218 (46)  | 0.21  |                                |           |      |
| Active IBD, <i>n</i> (%)                                | 6 (46)  | 101 (21)  | 0.10  |                                |           |      |
| Abnormal chest X-ray, <i>n</i> (%)                      | 12 (92) | 156 (33)  | 0.01  |                                |           |      |
| Steroids 3 months before COVID-19, <i>n</i> (%)         | 1 (7.7) | 50 (10.7) | 1     |                                |           |      |
| 5-aminosalicylates, at COVID-19 diagnosis, <i>n</i> (%) | 10 (77) | 187 (40)  | 0.012 | Unadjusted                     |           |      |
|                                                         |         |           |       | 4.6                            | 1.2-17    | 0.02 |
|                                                         |         |           |       | Adjusted to ulcerative colitis |           |      |
|                                                         |         |           |       | 3.6                            | 0.85-15.2 | 0.08 |
| Steroids at COVID-19 diagnosis, <i>n</i> (%)            | 1 (7.7) | 24 (5)    | 1     |                                |           |      |
| Immunomodulators at COVID-19 diagnosis, <i>n</i> (%)    | 3 (23)  | 159 (34)  | 0.5   |                                |           |      |
| Tiopurines, <i>n</i> (%)                                | 3 (23)  | 136 (29)  |       |                                |           |      |
| Methotrexate, <i>n</i> (%)                              | 0       | 19 (4)    |       |                                |           |      |
| Biologics at COVID-19 diagnosis, <i>n</i> (%)           | 4 (31)  | 164 (35)  | 0.88  |                                |           |      |
| Anti-TNF at COVID-19 diagnosis, <i>n</i> (%)            | 3 (23)  | 108 (23)  | 1     |                                |           |      |

IBD: inflammatory bowel disease, L1: ileal, L2: colonic, L3: ileocolic, L4: upper gastrointestinal tract. B1: inflammatory, B2: stricturing, B3: penetrant. E1: proctocolitis, E2: left-sided colitis, E3: pancolitis, TNF: tumour necrosis factor

Supplementary Table S6. Clinical characteristics and treatment for IBD in patients who **died due to COVID-19**

| Variable                                        | Death due to COVID-19<br><i>n</i> = 18 | Alive<br><i>n</i> = 462 | Univariate analysis | Multivariate analysis |          |                 |
|-------------------------------------------------|----------------------------------------|-------------------------|---------------------|-----------------------|----------|-----------------|
|                                                 |                                        |                         | <i>P</i> -value     | OR                    | CI       | <i>P</i> -value |
| Male gender, <i>n</i> (%)                       | 12 (67)                                | 238 (51)                | 0.21                |                       |          |                 |
| Ulcerative colitis, <i>n</i> (%)                | 7 (39)                                 | 213 (46)                | 0.48                |                       |          |                 |
| E1                                              | 1 (5.6)                                | 42 (9)                  |                     |                       |          |                 |
| E2                                              | 4 (22)                                 | 75 (16)                 |                     |                       |          |                 |
| E3                                              | 2 (11)                                 | 96 (21)                 |                     |                       |          |                 |
| Crohn's disease location, <i>n</i> (%)          |                                        |                         | 0.95                |                       |          |                 |
| L1                                              | 6 (33)                                 | 107 (23)                |                     |                       |          |                 |
| L2                                              | 1 (5.5)                                | 42 (9)                  |                     |                       |          |                 |
| L3                                              | 4 (22)                                 | 84 (18)                 |                     |                       |          |                 |
| L4 (isolated)                                   | 0                                      | 3 (0.6)                 |                     |                       |          |                 |
| Crohn's disease behaviour, <i>n</i> (%)         |                                        |                         |                     |                       |          |                 |
| B1                                              | 4 (22)                                 | 140 (30)                | 0.23                |                       |          |                 |
| B2                                              | 3 (17)                                 | 68 (15)                 | 1                   |                       |          |                 |
| B3                                              | 5 (28)                                 | 42 (9)                  | 0.06                |                       |          |                 |
| Active B3                                       | 2 (11)                                 | 10 (2.2)                | 0.17                |                       |          |                 |
| Perianal disease, <i>n</i> (%)                  | 5 (28)                                 | 54 (12)                 | 0.18                |                       |          |                 |
| Extraintestinal manifestations,<br><i>n</i> (%) | 4 (22)                                 | 121 (26)                | 0.78                |                       |          |                 |
| Active smoker, <i>n</i> (%)                     | 2 (11)                                 | 51 (11)                 | 0.99                |                       |          |                 |
| ≥ 40 years, <i>n</i> (%)                        | 16 (89)                                | 368 (80)                | 0.50                |                       |          |                 |
| ≥ 50 years, <i>n</i> (%)                        | 16 (89)                                | 270 (58)                | 0.01                |                       |          |                 |
| ≥ 60 years, <i>n</i> (%)                        | 15 (83)                                | 132 (28)                | < 0.0001            | 7.1                   | 1.8-27.4 | 0.004           |
| Family history of IBD, <i>n</i> (%)             | 3 (17)                                 | 60 (13)                 | 0.17                |                       |          |                 |
| ≥1 comorbidity, <i>n</i> (%)                    | 16 (89)                                | 193 (42)                | < 0.0001            |                       |          |                 |
| ≥2 comorbidity, <i>n</i> (%)                    | 12 (67)                                | 87 (19)                 | < 0.0001            | 3.9                   | 1.3-11.6 | 0.01            |
| Charlson score ≥1, <i>n</i> (%)                 | 18 (100)                               | 289 (62)                | 0.001               |                       |          |                 |
| Charlson score ≥2, <i>n</i> (%)                 | 17 (94)                                | 170 (37)                | < 0.0001            |                       |          |                 |
| Occupational risk, <i>n</i> (%)                 | 2 (11)                                 | 131 (28)                | 0.28                |                       |          |                 |
| Good social distancing, <i>n</i> (%)            | 12 (67)                                | 222 (48)                | 0.03                |                       |          |                 |



|                                                         |         |          |       |  |
|---------------------------------------------------------|---------|----------|-------|--|
| Active IBD, <i>n</i> (%)                                | 5 (28)  | 91 (20)  | 0.59  |  |
| Abnormal chest X-ray, <i>n</i> (%)                      | 16 (89) | 156 (34) | 0.001 |  |
| Steroids 3 months before COVID-19, <i>n</i> (%)         | 1 (5.5) | 51 (11)  | 0.73  |  |
| 5-aminosalicylates, at COVID-19 diagnosis, <i>n</i> (%) | 10 (55) | 197 (43) | 0.28  |  |
| Steroids at COVID-19 diagnosis, <i>n</i> (%)            | 1 (5.5) | 24 (5.2) | 1     |  |
| Immunomodulators at COVID-19 diagnosis, <i>n</i> (%)    | 4 (22)  | 166 (36) | 0.23  |  |
| Tiopurines, <i>n</i> (%)                                | 3 (17)  | 143 (31) |       |  |
| Methotrexate, <i>n</i> (%)                              | 1 (5.5) | 18 (3.9) |       |  |
| Biologics at COVID-19 diagnosis, <i>n</i> (%)           | 7 (39)  | 170 (37) | 0.86  |  |
| Anti-TNF at COVID-19 diagnosis, <i>n</i> (%)            | 4 (22)  | 113 (24) | 1     |  |

IBD: inflammatory bowel disease, L1: ileal, L2: colonic, L3: ileocolic, L4: upper gastrointestinal tract. B1: inflammatory, B2: stricturing, B3: penetrant. E1: proctocolitis, E2: left-sided colitis, E3: pancolitis, TNF: tumour necrosis factor

Supplementary Table S7. Clinical characteristics and treatment for IBD in patients with **Severe COVID-19\***

| Variable                                            | Severe COVID-19<br><br><i>n</i> = 38 | Not severe<br>COVID-19<br><br><i>n</i> = 444 | Univariate<br>analysis | Multivariate analysis |               |                 |  |  |
|-----------------------------------------------------|--------------------------------------|----------------------------------------------|------------------------|-----------------------|---------------|-----------------|--|--|
|                                                     |                                      |                                              | <i>P</i> -value        | OR                    | CI            | <i>P</i> -value |  |  |
| Male gender, <i>n</i> (%)                           | 24 (63)                              | 227 (51)                                     | 0.15                   |                       |               |                 |  |  |
| Ulcerative colitis, <i>n</i> (%)                    | 19 (50)                              | 202 (46)                                     | 0.60                   |                       |               |                 |  |  |
| E1                                                  | 4 (10.5)                             | 39 (8.8)                                     |                        |                       |               |                 |  |  |
| E2                                                  | 9 (24)                               | 71 (16)                                      |                        |                       |               |                 |  |  |
| E3                                                  | 6 (16)                               | 92 (20)                                      |                        |                       |               |                 |  |  |
| Crohn's disease location, <i>n</i> (%)              |                                      |                                              | 0.65                   |                       |               |                 |  |  |
| L1                                                  | 11 (29)                              | 102 (23)                                     |                        |                       |               |                 |  |  |
| L2                                                  | 2 (5.3)                              | 41 (9.1)                                     |                        |                       |               |                 |  |  |
| L3                                                  | 5 (13)                               | 83 (19)                                      |                        |                       |               |                 |  |  |
| L4 (isolated)                                       | 0                                    | 3 (0.7)                                      |                        |                       |               |                 |  |  |
| Crohn's disease behaviour, <i>n</i> (%)             |                                      |                                              |                        | 0.29                  | 0.1-0.9       | 0.03            |  |  |
| B1                                                  | 6 (16)                               | 138 (31)                                     | 0.03                   |                       |               |                 |  |  |
| Active B1                                           | 2 (5.3)                              | 31 (6.9)                                     | 1                      |                       |               |                 |  |  |
| B2                                                  | 7 (18)                               | 64 (14)                                      | 0.32                   |                       |               |                 |  |  |
| B3                                                  | 6 (16)                               | 41 (9.1)                                     | 0.19                   |                       |               |                 |  |  |
| Perianal disease, <i>n</i> (%)                      | 5 (13)                               | 54 (12)                                      | 0.92                   |                       |               |                 |  |  |
| Extraintestinal manifestations,<br><br><i>n</i> (%) | 9 (24)                               | 116 (26)                                     | 0.80                   |                       |               |                 |  |  |
| Active smoker, <i>n</i> (%)                         | 3 (7.9)                              | 50 (11)                                      | 0.88                   |                       |               |                 |  |  |
| Abnormal chest X-ray, <i>n</i> (%)                  | 33 (87)                              | 140 (32)                                     | <0.0001                |                       |               |                 |  |  |
| ≥ 40 years, <i>n</i> (%)                            | 34 (89)                              | 352 (77)                                     | 0.13                   |                       |               |                 |  |  |
| ≥ 50 years, <i>n</i> (%)                            | 33 (87)                              | 255 (57)                                     | <0.0001                |                       |               |                 |  |  |
| ≥ 60 years, <i>n</i> (%)                            | 26 (68)                              | 123 (28)                                     | <0.0001                | 4.59                  | 1.3-<br>15.9  | 0.02            |  |  |
| Family history of IBD, <i>n</i> (%)                 | 8 (21)                               | 56 (13)                                      | 0.35                   |                       |               |                 |  |  |
| ≥1 comorbidity, <i>n</i> (%)                        | 30 (79)                              | 181 (41)                                     | <0.0001                | 3.25                  | 0.94-<br>11.3 | 0.06            |  |  |
| ≥2 comorbidity, <i>n</i> (%)                        | 19 (50)                              | 82 (18)                                      | <0.0001                |                       |               |                 |  |  |

|                                                         |          |           |              |       |                |      |
|---------------------------------------------------------|----------|-----------|--------------|-------|----------------|------|
| Charlson score $\geq 1$ , <i>n</i> (%)                  | 36 (95)  | 273 (61)  | <0.0001      |       |                |      |
| Charlson score $\geq 2$ , <i>n</i> (%)                  | 32 (84)  | 157 (35)  | <0.0001      |       |                |      |
| Occupational risk, <i>n</i> (%)                         | 7 (18)   | 126 (28)  | 0.26         |       |                |      |
| Good social distancing, <i>n</i> (%)                    | 25 (66)  | 210 (47)  | 0.01         | 3.47  | 0.89-<br>13.45 | 0.07 |
| Active IBD, <i>n</i> (%)                                | 11 (29)  | 101 (23)  | 0.38         |       |                |      |
| Steroids 3 months before COVID-19, <i>n</i> (%)         | 5 (13)   | 48 (10.8) | 0.86         |       |                |      |
| 5-aminosalicylates, at COVID-19 diagnosis, <i>n</i> (%) | 25 (66)  | 183 (41)  | <b>0.003</b> | 2.2   | 0.67-<br>7.33  | 0.19 |
| Steroids at COVID-19 diagnosis, <i>n</i> (%)            | 4 (10.5) | 22 (4.9)  | 0.28         |       |                |      |
| Immunomodulators at COVID-19 diagnosis, <i>n</i> (%)    | 8 (21)   | 163 (37)  | <b>0.05</b>  | 0.676 | 0.2-2.1        | 0.51 |
| Tiopurines, <i>n</i> (%)                                | 7 (18)   | 140 (31)  |              |       |                |      |
| Methotrexate, <i>n</i> (%)                              | 1 (2.6)  | 18 (4)    |              |       |                |      |
| Biologics at COVID-19 diagnosis, <i>n</i> (%)           | 12 (32)  | 165 (37)  | 0.49         |       |                |      |
| Anti-TNF at COVID-19 diagnosis, <i>n</i> (%)            | 7 (18)   | 110 (25)  | 0.38         |       |                |      |

IBD: inflammatory bowel disease, L1: ileal, L2: colonic, L3: ileocolic, L4: upper gastrointestinal tract. B1: inflammatory, B2: stricturing, B3: penetrant. E1: proctocolitis, E2: left-sided colitis, E3: pancolitis, TNF: tumour necrosis factor

\*Severe COVID-19: composite of intensive care unit admission and/or use of active amines and/or respiratory distress and/or invasive oxygen therapy and/or death

Supplementary Table S8. Incidence of adverse outcomes of COVID-19 patient in the ENEIDA registry

| <b>Hospitalisation</b>    |                      |
|---------------------------|----------------------|
| < 50 years: 160 x 100 000 | Men: 386 x 100 000   |
| ≥ 50 years: 475x 100 000  | Women: 260 x 100 000 |
| <b>Death</b>              |                      |
| < 50 years: 8 x 100 000   | Men: 38 x 100 000    |
| ≥ 50 years: 59 x 100 000  | Women: 24 x 100 000  |
| <b>ICU admission</b>      |                      |
| < 50 years: 8 x 100 000   | Men: 34 x 100 000    |
| ≥ 50 years: 41 x 100 000  | Women: 16 x 100 000  |
| <b>Severe COVID-19*</b>   |                      |
| < 50 years: 21 x 100 000  | Men: 91 x 100 000    |
| ≥ 50 years: 122 x 100 000 | Women: 56 x 100 000  |

\*Severe COVID-19: composite of intensive care unit admission and/or use of active amines and/or respiratory distress and/or invasive oxygen therapy and/or death

Supplementary Table S9. Clinical characteristics and treatment for IBD in patients with **3 months physical sequelae**

| Variable                                     | Physical sequelae at 3 months<br><i>n</i> = 56 | Not physical sequelae at 3 months<br><i>n</i> = 406 | Univariate analysis | Multivariate analysis |         |                 |
|----------------------------------------------|------------------------------------------------|-----------------------------------------------------|---------------------|-----------------------|---------|-----------------|
|                                              |                                                |                                                     | <i>P</i> -value     | OR                    | CI      | <i>P</i> -value |
| Male gender, <i>n</i> (%)                    | 29 (52)                                        | 209 (51)                                            | 0.97                |                       |         |                 |
| Ulcerative colitis, <i>n</i> (%)             | 28 (50)                                        | 185 (45)                                            | 0.32                |                       |         |                 |
| E1                                           | 3 (5.4)                                        | 36 (8.9)                                            |                     |                       |         |                 |
| E2                                           | 16 (29)                                        | 59 (15)                                             |                     |                       |         |                 |
| E3                                           | 12 (21)                                        | 82 (20)                                             |                     |                       |         |                 |
| Crohn's disease location, <i>n</i> (%)       |                                                |                                                     | 0.81                |                       |         |                 |
| L1                                           | 9 (16)                                         | 98 (24)                                             |                     |                       |         |                 |
| L2                                           | 4 (7.1)                                        | 38 (9.4)                                            |                     |                       |         |                 |
| L3                                           | 11 (20)                                        | 73 (18)                                             |                     |                       |         |                 |
| L4 (isolated)                                | 0                                              | 3 (0.7)                                             |                     |                       |         |                 |
| Crohn's disease behaviour, <i>n</i> (%)      |                                                |                                                     |                     |                       |         |                 |
| B1                                           | 15 (27)                                        | 125 (31)                                            | 0.74                |                       |         |                 |
| B2                                           | 7 (13)                                         | 61 (15)                                             | 0.97                |                       |         |                 |
| B3                                           | 3 (5.4)                                        | 39 (9.6)                                            | 0.66                |                       |         |                 |
| Perianal disease, <i>n</i> (%)               | 6 (11)                                         | 49 (12)                                             | 0.24                |                       |         |                 |
| Extraintestinal manifestations, <i>n</i> (%) | 16 (29)                                        | 105 (26)                                            | 0.56                |                       |         |                 |
| Active smoker, <i>n</i> (%)                  | 7 (13)                                         | 44 (11)                                             | 0.95                |                       |         |                 |
| Abnormal chest X-ray, <i>n</i> (%)           | 23 (41)                                        | 133 (33)                                            | 0.25                |                       |         |                 |
| ≥ 40 years, <i>n</i> (%)                     | 49 (88)                                        | 319 (79)                                            | 0.12                |                       |         |                 |
| ≥ 50 years, <i>n</i> (%)                     | 41 (73)                                        | 229 (56)                                            | 0.02                | 1.3                   | 0.3-5.9 | 0.71            |
| ≥ 60 years, <i>n</i> (%)                     | 18 (32)                                        | 114 (28)                                            | 0.53                |                       |         |                 |
| Family history of IBD, <i>n</i> (%)          | 3 (5.3)                                        | 57 (14)                                             | 0.19                |                       |         |                 |
| ≥1 comorbidity, <i>n</i> (%)                 | 29 (52)                                        | 164 (40)                                            | 0.11                |                       |         |                 |
| ≥2 comorbidity, <i>n</i> (%)                 | 15 (27)                                        | 72 (18)                                             | 0.10                |                       |         |                 |
| Charlson score ≥1, <i>n</i> (%)              | 43 (77)                                        | 246 (60)                                            | 0.02                |                       |         |                 |
| Charlson score ≥2, <i>n</i> (%)              | 26 (46)                                        | 144 (35)                                            | 0.11                |                       |         |                 |
| Occupational risk, <i>n</i> (%)              | 13 (23)                                        | 118 (29)                                            | 0.48                |                       |         |                 |
| Good social distancing, <i>n</i> (%)         | 26 (46)                                        | 188 (46)                                            | 0.79                |                       |         |                 |

|                                                         |          |          |              |            |                 |             |
|---------------------------------------------------------|----------|----------|--------------|------------|-----------------|-------------|
| Active IBD, <i>n</i> (%)                                | 12 (21)  | 71 (17)  | 0.49         |            |                 |             |
| Steroids 3 months before COVID-19, <i>n</i> (%)         | 12 (21)  | 39 (9.6) | <b>0.008</b> | <b>1.4</b> | <b>1.07-1.7</b> | <b>0.01</b> |
| 5-aminosalicylates, at COVID-19 diagnosis, <i>n</i> (%) | 32 (57)  | 165(41)  | 0.019        | 1.7        | 0.98-3.1        | 0.06        |
| Steroids at COVID-19 diagnosis, <i>n</i> (%)            | 6 (10.7) | 18 (4.4) | 0.1          |            |                 |             |
| Immunomodulators at COVID-19 diagnosis, <i>n</i> (%)    | 17 (30)  | 149 (37) | 0.35         |            |                 |             |
| Tiopurines, <i>n</i> (%)                                | 16 (29)  | 127 (31) |              |            |                 |             |
| Methotrexate, <i>n</i> (%)                              | 1 (1.8)  | 17 (4.2) |              |            |                 |             |
| Biologics at COVID-19 diagnosis, <i>n</i> (%)           | 17 (30)  | 153 (38) | 0.29         |            |                 |             |
| Anti-TNF at COVID-19 diagnosis, <i>n</i> (%)            | 16 (29)  | 97 (24)  | 0.44         |            |                 |             |
| Hospitalisation, <i>n</i> (%)                           | 26 (46)  | 124 (30) | 0.02         | 1.57       | 0.87-2.8        | 0.14        |
| ICU admission, <i>n</i> (%)                             | 3 (5.3)  | 5 (1.2)  | 0.11         |            |                 |             |

IBD: inflammatory bowel disease, ICU: intensive care unit, L1: ileal, L2: colonic, L3: ileocolic, L4: upper gastrointestinal tract. B1: inflammatory, B2: stricturing, B3: penetrant. E1: proctocolitis, E2: left-sided colitis, E3: pancolitis, TNF: tumour necrosis factor

Supplementary Table S10. Clinical characteristics and treatment for IBD in patients with **12 months physical sequelae**

| Variable                                     | Physical sequelae at 12 months<br><i>n</i> = 67 | Not physical sequelae at 12 months<br><i>n</i> = 385 | Univariate analysis | Multivariate analysis |         |                 |
|----------------------------------------------|-------------------------------------------------|------------------------------------------------------|---------------------|-----------------------|---------|-----------------|
|                                              |                                                 |                                                      | <i>P</i> -value     | OR                    | CI      | <i>P</i> -value |
| Male gender, <i>n</i> (%)                    | 36 (54)                                         | 197 (51)                                             | 0.7                 |                       |         |                 |
| Ulcerative colitis, <i>n</i> (%)             | 31 (46)                                         | 177 (46)                                             | 0.86                |                       |         |                 |
| E1                                           | 5 (7.5)                                         | 37 (9.6)                                             |                     |                       |         |                 |
| E2                                           | 12 (18)                                         | 63 (16)                                              |                     |                       |         |                 |
| E3                                           | 11 (16)                                         | 85 (22)                                              |                     |                       |         |                 |
| Crohn's disease location, <i>n</i> (%)       |                                                 |                                                      | 0.72                |                       |         |                 |
| L1                                           | 11 (16)                                         | 69 (18)                                              |                     |                       |         |                 |
| L2                                           | 8 (12)                                          | 31 (8.1)                                             |                     |                       |         |                 |
| L3                                           | 8 (12)                                          | 62 (16)                                              |                     |                       |         |                 |
| L4 (isolated)                                | 0                                               | 3 (0.8)                                              |                     |                       |         |                 |
| Crohn's disease behaviour, <i>n</i> (%)      |                                                 |                                                      |                     |                       |         |                 |
| B1                                           | 20 (30)                                         | 116 (30)                                             | 0.83                |                       |         |                 |
| B2                                           | 9 (13)                                          | 58 (15)                                              | 0.81                |                       |         |                 |
| B3                                           | 4 (5.9)                                         | 37 (9.6)                                             | 0.36                |                       |         |                 |
| Perianal disease, <i>n</i> (%)               | 15 (22)                                         | 56 (15)                                              | 0.1                 |                       |         |                 |
| Extraintestinal manifestations, <i>n</i> (%) | 24 (36)                                         | 94 (24)                                              | 0.15                |                       |         |                 |
| Active smoker, <i>n</i> (%)                  | 6 (8.9)                                         | 45 (12)                                              | 0.13                |                       |         |                 |
| Abnormal chest X-ray, <i>n</i> (%)           | 32 (48)                                         | 124 (32)                                             | 0.08                | 1.8                   | 0.2-5.8 | 0.17            |
| ≥ 40 years, <i>n</i> (%)                     | 58 (87)                                         | 302 (78)                                             | 0.13                |                       |         |                 |
| ≥ 50 years, <i>n</i> (%)                     | 49 (73)                                         | 214 (56)                                             | 0.07                | 1                     | 0.2-4.8 | 0.95            |
| ≥ 60 years, <i>n</i> (%)                     | 20 (30)                                         | 107 (28)                                             | 0.73                |                       |         |                 |
| Family history of IBD, <i>n</i> (%)          | 7 (10)                                          | 50 (13)                                              | 0.83                |                       |         |                 |
| ≥1 comorbidity, <i>n</i> (%)                 | 29 (43)                                         | 160 (42)                                             | 0.79                |                       |         |                 |
| ≥2 comorbidity, <i>n</i> (%)                 | 18 (27)                                         | 67 (17)                                              | 0.07                |                       |         |                 |
| Charlson score ≥1, <i>n</i> (%)              | 51 (76)                                         | 231 (60)                                             | 0.01                | 1.2                   | 0.2-5.8 | 0.84            |
| Charlson score ≥2, <i>n</i> (%)              | 30 (45)                                         | 134 (35)                                             | 0.12                |                       |         |                 |
| Occupational risk, <i>n</i> (%)              | 17 (25)                                         | 111 (29)                                             | 0.63                |                       |         |                 |
| Good social distancing, <i>n</i> (%)         | 34 (51)                                         | 177 (46)                                             | 0.68                |                       |         |                 |

|                                                         |         |          |      |      |         |      |
|---------------------------------------------------------|---------|----------|------|------|---------|------|
| Active IBD, <i>n</i> (%)                                | 12 (18) | 70 (18)  | 0.93 |      |         |      |
| Steroids 3 months before COVID-19, <i>n</i> (%)         | 11 (16) | 40 (10)  | 0.15 |      |         |      |
| 5-aminosalicylates, at COVID-19 diagnosis, <i>n</i> (%) | 34 (51) | 159 (41) | 0.15 |      |         |      |
| Steroids at COVID-19 diagnosis, <i>n</i> (%)            | 6 (8.9) | 18 (4.7) | 0.25 |      |         |      |
| Immunomodulators at COVID-19 diagnosis, <i>n</i> (%)    | 22 (33) | 143 (37) | 0.5  |      |         |      |
| Tiopurines, <i>n</i> (%)                                | 17 (25) | 125 (32) |      |      |         |      |
| Methotrexate, <i>n</i> (%)                              | 5 (7.5) | 13 (3.4) |      |      |         |      |
| Biologics at COVID-19 diagnosis, <i>n</i> (%)           | 23 (34) | 145 (38) | 0.6  |      |         |      |
| Anti-TNF at COVID-19 diagnosis, <i>n</i> (%)            | 15 (22) | 96 (25)  | 0.66 |      |         |      |
| Hospitalisation, <i>n</i> (%)                           | 30 (45) | 119 (31) | 0.03 | 0.95 | 0.4-2.2 | 0.89 |
| ICU admission, <i>n</i> (%)                             | 2 (2.9) | 6 (1.6)  | 0.75 |      |         |      |

IBD: inflammatory bowel disease, ICU: intensive care unit, L1: ileal, L2: colonic, L3: ileocolic, L4: upper gastrointestinal tract. B1: inflammatory, B2: stricturing, B3: penetrant. E1: proctocolitis, E2: left-sided colitis, E3: pancolitis, TNF: tumour necrosis factor
